# Supplementary material for: Methylation patterns of RASA3 associated with clinicopathological factors in hepatocellular carcinoma
Source: PubMed Central journal article supplement — J Cancer. 2018 May 25;9(12):2116–22. doi: 10.7150/jca.24567 (PMC6010675; doi:10.7150/jca.24567), 2018-05-25
Supplement: jcav09p2116s1.pdf [file jcav09p2116s1.pdf]

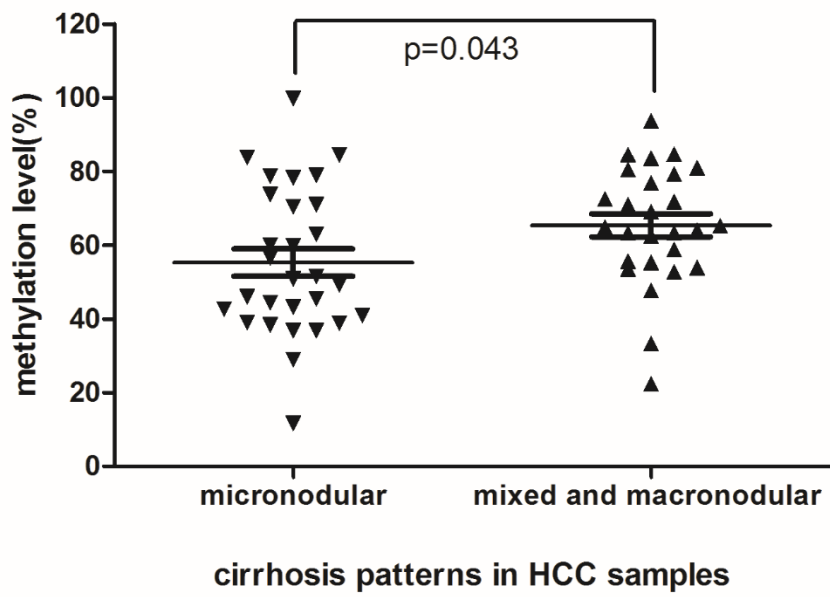

Supplementary Figure1: The methylation levels of RASA3 in HCC between micronodular and mixed and macronodular patients.

Supplemental Table 1. The primers of amplicons for methylation genotyping

| Amplicon  | Primer   | Sequence                                                         |
|-----------|----------|------------------------------------------------------------------|
|           | Forwards | 5'aggaagagagGGTATTTTTGGTGAAGGTAATTGAA3'                          |
| Amplicon1 | Reverse  | 5'cagtaatacagactcactataggagaaggctAAAACAAAATACAAAC<br>CCATTCC3'   |
|           | Forwards | 5'aggaagagagGGGTTTTAGTAGTTTTTGAAGTGGG3'                          |
| Amplicon2 | Reverse  | 5'cagtaatacagactcactataggagaaggctACTACAAACCCTAAAAA<br>CCTCTCCA3' |

Supplementary Table 2. The summary positions of the 12 CpG sites in the amplicon 1.

| Gene  | ID         | Position         |
|-------|------------|------------------|
| RASA3 | cg06698414 | Chr13: 114843024 |
|       | CpG1       | Chr13: 114843725 |
|       | CpG2       | Chr13: 114843684 |
|       | CpG3       | Chr13: 114843679 |
|       | CpG4       | Chr13: 114843649 |
|       | CpG5       | Chr13: 114843625 |
|       | CpG6       | Chr13: 114843622 |
|       | CpG7       | Chr13: 114843614 |
|       | CpG8       | Chr13: 114843609 |
|       | CpG9       | Chr13: 114843606 |
|       | CpG10      | Chr13: 114843595 |
|       | CpG11      | Chr13: 114843541 |
|       | CpG12      | Chr13: 114843513 |
|       | cg17596359 | Chr13: 114844124 |

Supplementary Table 3. The summary positions of the 6 CpG sites in amplicon2

| Gene  | ID         | Position         |
|-------|------------|------------------|
| RASA3 | cg11570367 | Chr13: 114896683 |
|       | CpG1       | Chr13: 114897018 |
|       | CpG2       | Chr13: 114897012 |
|       | CpG3       | Chr13: 114897006 |
|       | CpG4       | Chr13: 114896893 |
|       | CpG5       | Chr13: 114896840 |
|       | CpG6       | Chr13: 114896838 |
|       | cg00098553 | Chr13:114897502  |

Supplementary Table 4. The comparison between methylation levels of the 6 CpG sites

| CpGs   | Group  | mean  | Δ mean | P Value | P Value<br>(Bonferroni correction) |
|--------|--------|-------|--------|---------|------------------------------------|
| CpG1   | Tumor  | 29.0% | 0.19%  | 0.787   | 1                                  |
|        | Normal | 28.8% |        |         |                                    |
| CpG2.3 | Tumor  | 40.6% | 1.21%  | 0.070   | 0.280                              |
|        | Normal | 39.4% |        |         |                                    |
| CpG4   | Tumor  | 20.8% | -0.05% | 0.951   | 1                                  |
|        | Normal | 20.8% |        |         |                                    |
| CpG5.6 | Tumor  | 33.1% | 2.01%  | 0.012   | 0.048                              |
|        | Normal | 31.1% |        |         |                                    |

Supplementary Table 5. The correlation of the methylation among the 11 genotyped CpG sites

| Correlations | R <sup>2</sup> |          |          |          |          |          |          |       |
|--------------|----------------|----------|----------|----------|----------|----------|----------|-------|
|              | CpG1           | CpG2.3   | CpG4     | CpG5.6   | CpG7.8   | CpG9     | CpG10    | CpG11 |
| P VALUE      |                |          |          |          |          |          |          |       |
| CpG1         | 1.00           | 0.64     | 0.60     | 0.45     | 0.62     | 0.45     | 0.41     | 0.48  |
| CpG2.3       | 1.46E-33       | 1.00     | 0.75     | 0.48     | 0.72     | 0.61     | 0.40     | 0.50  |
| CpG4         | 3.41E-29       | 4.72E-53 | 1.00     | 0.49     | 0.77     | 0.59     | 0.59     | 0.65  |
| CpG5.6       | 1.44E-14       | 5.02E-17 | 2.41E-17 | 1.00     | 0.58     | 0.43     | 0.29     | 0.43  |
| CpG7.8       | 5.97E-32       | 1.16E-46 | 7.90E-58 | 2.01E-26 | 1.00     | 0.68     | 0.47     | 0.60  |
| CpG9         | 1.59E-15       | 1.14E-30 | 1.11E-27 | 1.90E-13 | 2.40E-40 | 1.00     | 0.40     | 0.50  |
| CpG10        | 2.22E-13       | 2.89E-13 | 5.02E-30 | 4.89E-7  | 8.53E-19 | 6.11E-13 | 1.00     | 0.64  |
| CpG11        | 2.14E-18       | 4.57E-20 | 1.26E-36 | 2.07E-13 | 1.32E-30 | 6.26E-20 | 1.54E-37 | 1.00  |

Supplementary Table 6, the methylation difference and the correlation analysis

| Probe ID   | Position        | Methylation Changes (n=50) |        |        |          | Methylation-Expression correlation (n=231) |          |
|------------|-----------------|----------------------------|--------|--------|----------|--------------------------------------------|----------|
|            |                 | Mean-T                     | Mean-N | Diff   | P value  | r                                          | P value  |
| cg06698414 | Chr13:114843024 | 0.068                      | 0.308  | -0.241 | 5.53E-08 | 0.669                                      | 2.57E-31 |
| cg17596359 | Chr13:114844124 | 0.123                      | 0.323  | -0.199 | 6.69E-08 | 0.472                                      | 3.29E-14 |
| cg11570367 | Chr13:114896683 | 0.098                      | 0.098  | 0.000  | 0.990    | -0.126                                     | 0.057    |
| cg00098553 | Chr13:114897502 | -0.291                     | -0.363 | 0.071  | 0.018    | -0.422                                     | 2.18E-11 |

Mean-T, the mean methylation levels in tumor tissues, Mean-N, the mean methylation levels in normal tissues

Diff, the mean different between tumor and normal tissues
